# Supplementary material for: Controllable synthesis of uniform BiOF nanosheets and their improved photocatalytic activity by an exposed high-energy (002) facet and internal electric field
Source: Royal Society of Chemistry journal article supplement (doi:10.1039/c5ra14769g), 2015-01-01
Supplement: c5ra14769g1.pdf [file c5ra14769g1.pdf]

Supporting information

**Controllable synthesis of uniform BiOF nanosheets and the improved photocatalytic activity by high-energy (002) facet exposed and internal electric field**

Sijia Zou, Fei Teng\*, Chao Chang, Zailun Liu, Shurong Wang

Jiangsu Engineering and Technology Research Center of Environmental Cleaning Materials (ECM), Jiangsu Key Laboratory of Atmospheric Environment Monitoring and Pollution Control (AEMPC), Jiangsu Joint Laboratory of Atmospheric Pollution Control (APC), Collaborative Innovation Center of Atmospheric Environment and Equipment Technology (AEET), School of Environmental Science and Engineering, Nanjing University of Information Science & Technology, China

---

\* Corresponding author. Tel./Fax.: +86-25-9882-1090; Email address: tfwd@163.com

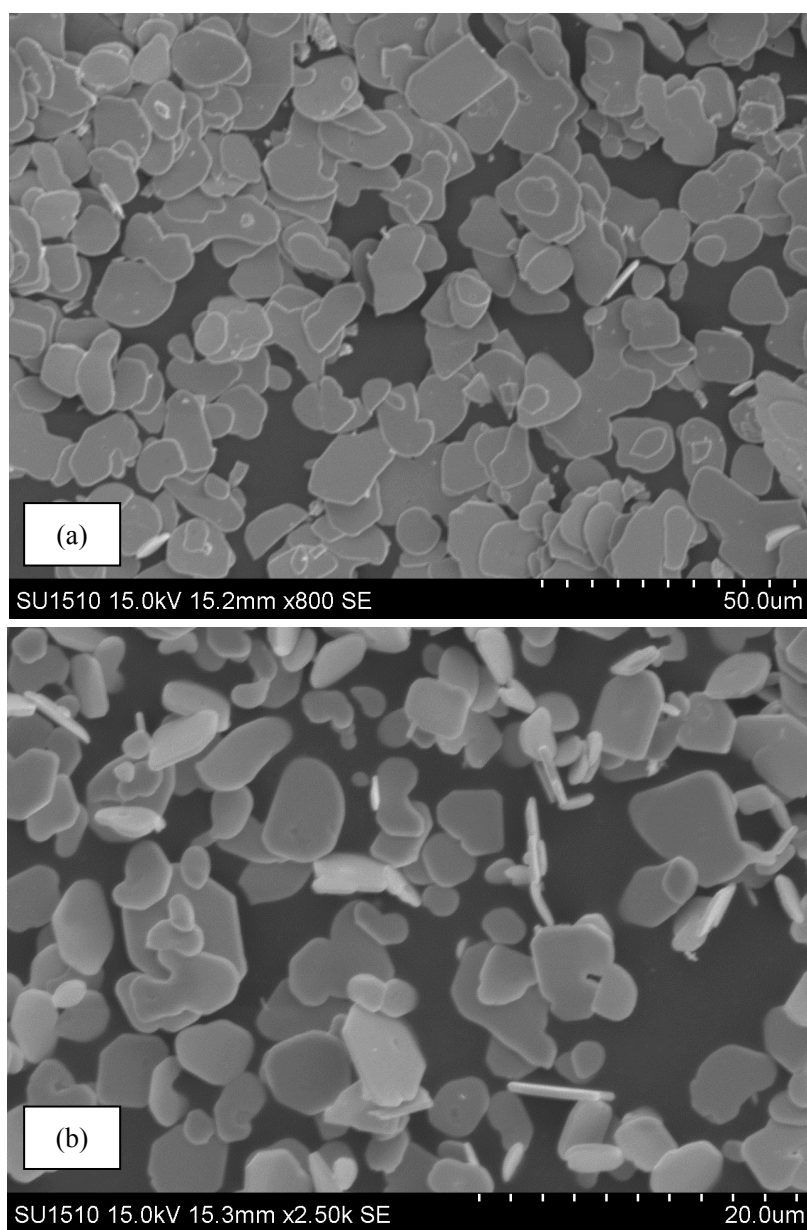

Fig.S1 SEM images of the as-prepared samples at pH=8 (a) and 9 (b)

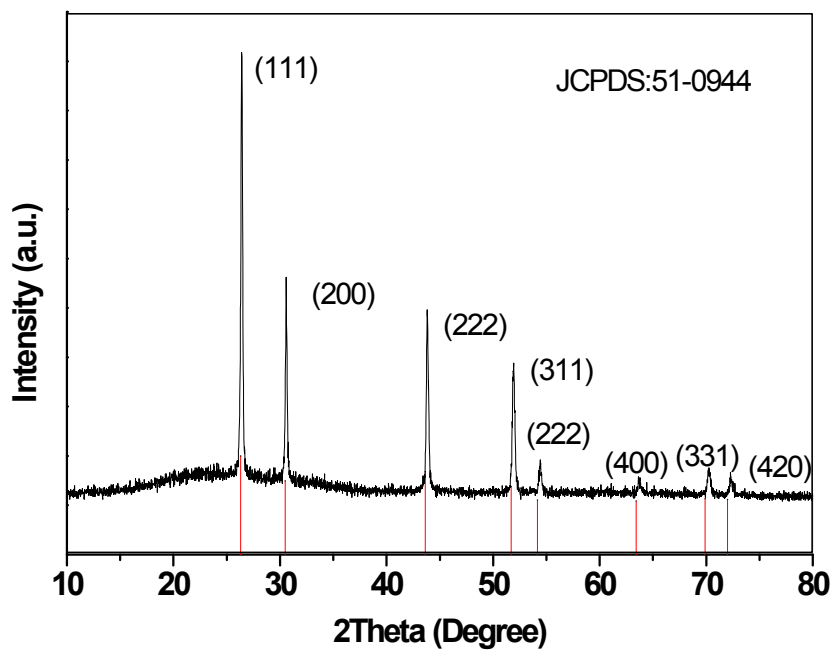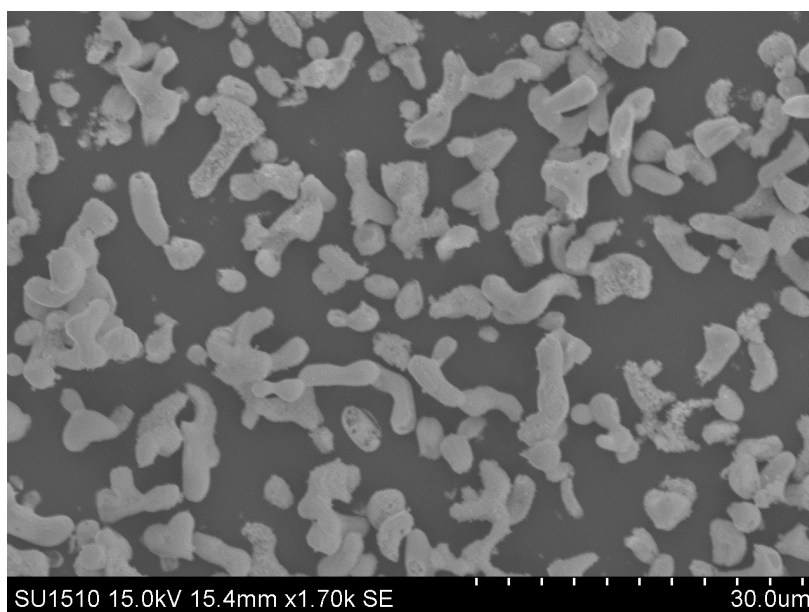

**Fig. S2** XRD patterns and SEM images of the as-prepared BiF<sub>3</sub> sample without adding HNO<sub>3</sub> or NH<sub>3</sub>·H<sub>2</sub>O
